# Supplementary material
Source: publisher site journal article supplement (https://www.dovepress.com/article/supplementary_file/532163/Supplementary%20material.docx)
Supplement: Supplementary file 1 [file Supplementary%20material.docx]

**Supplementary material**


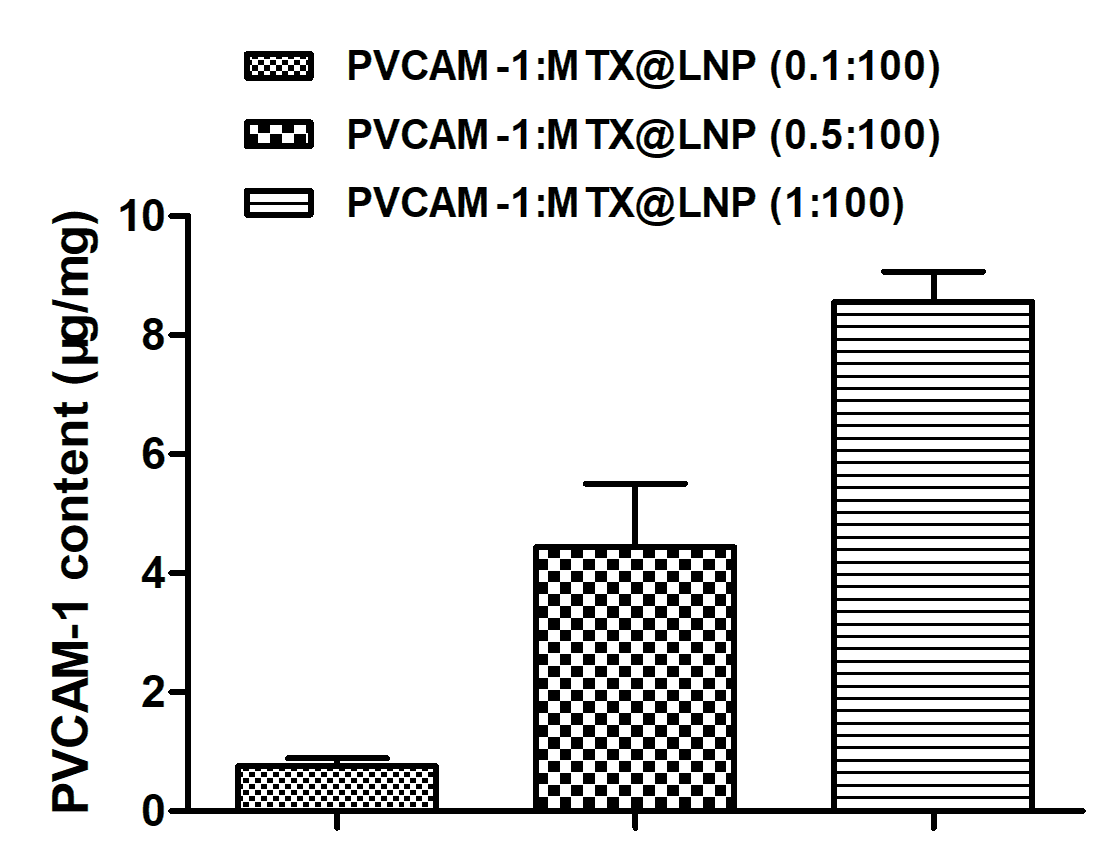


Figure S1. Binding amount of PVCAM-1 on MTX@LNP under different feeding ratios.


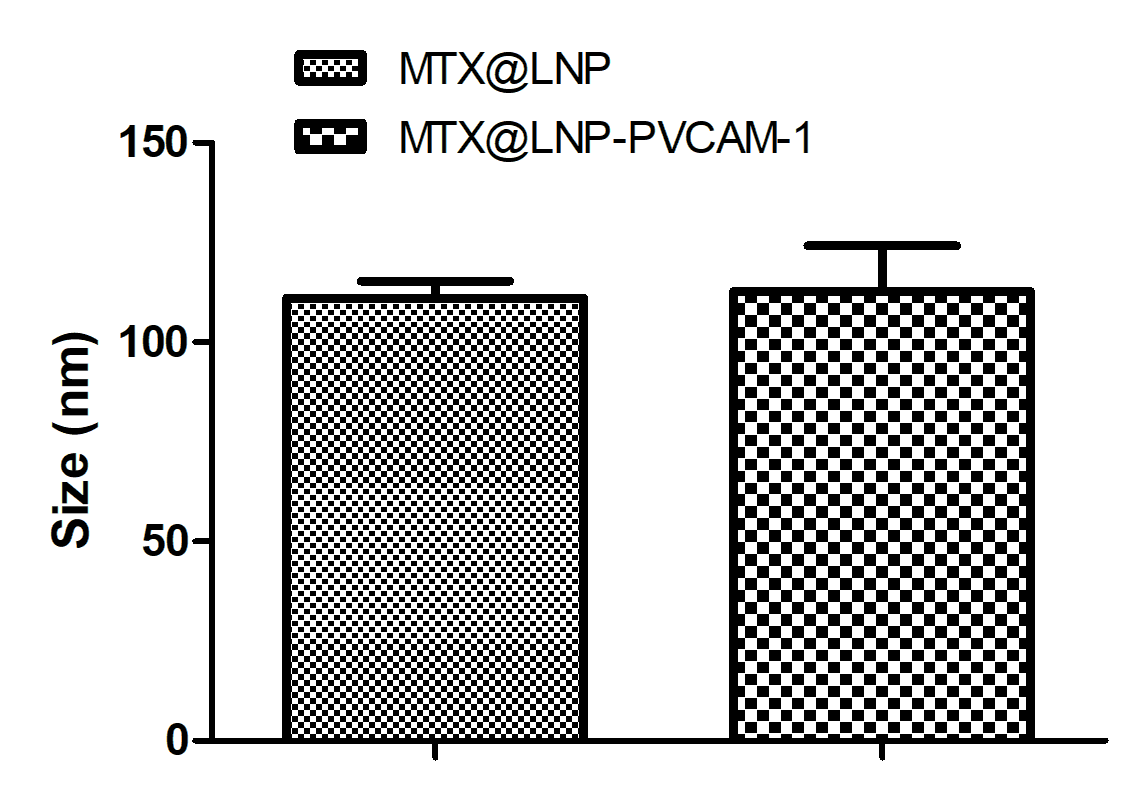


Figure S2. A histogram of MTX@LNP and MTX@LNP-PVCAM-1 for the TEM image.


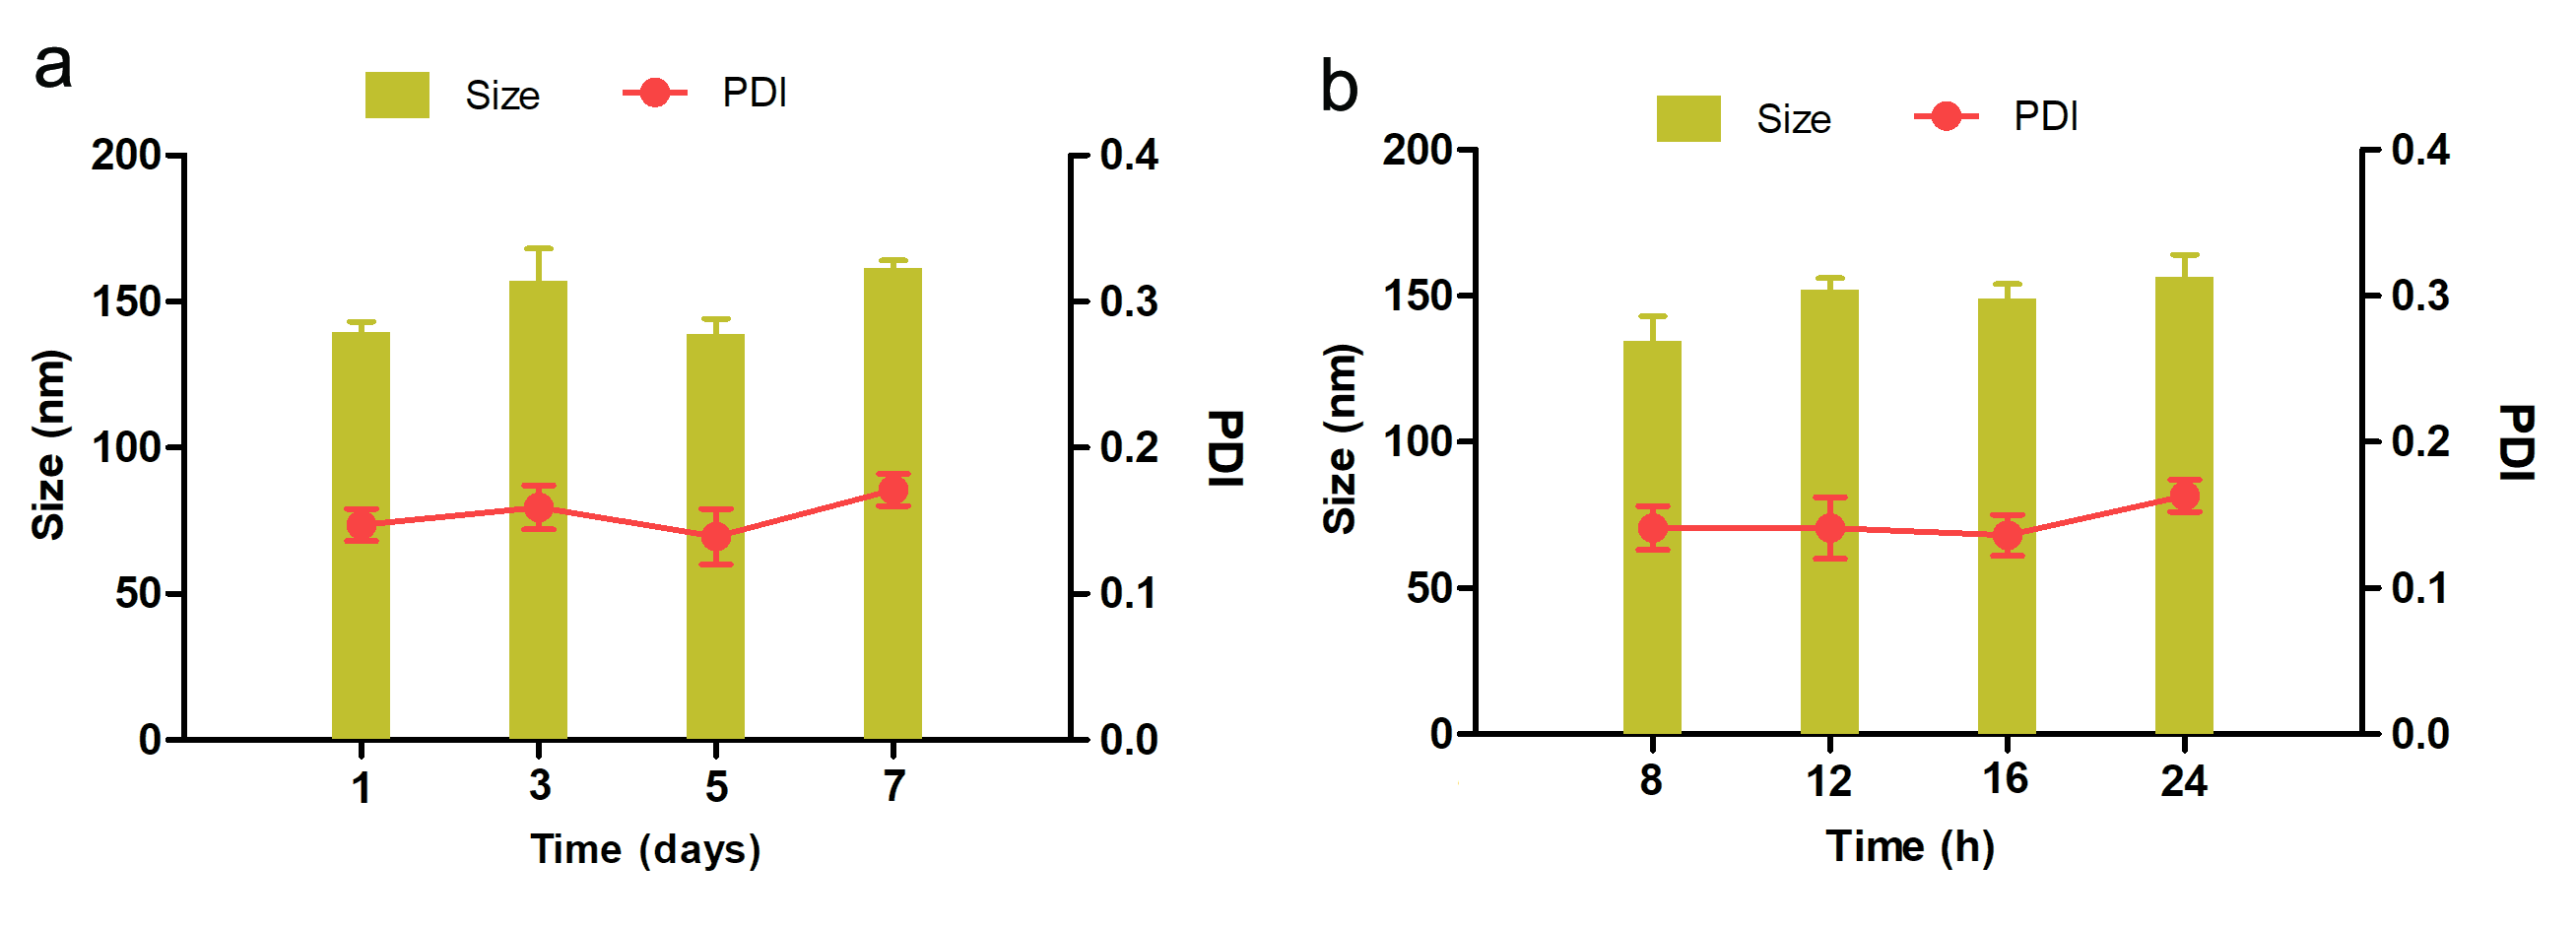


Figure S3. Stability of MTX@LNP in (a) PBS and (b) FBS.
